# Supplementary material
Source: Springer Nature journal article supplement (https://www.springermedizin.de/resource/supplementary/12985_2010_985_MOESM9_ESM.pdf/9608886)

# Natural history of disease in hamster PICV infection model

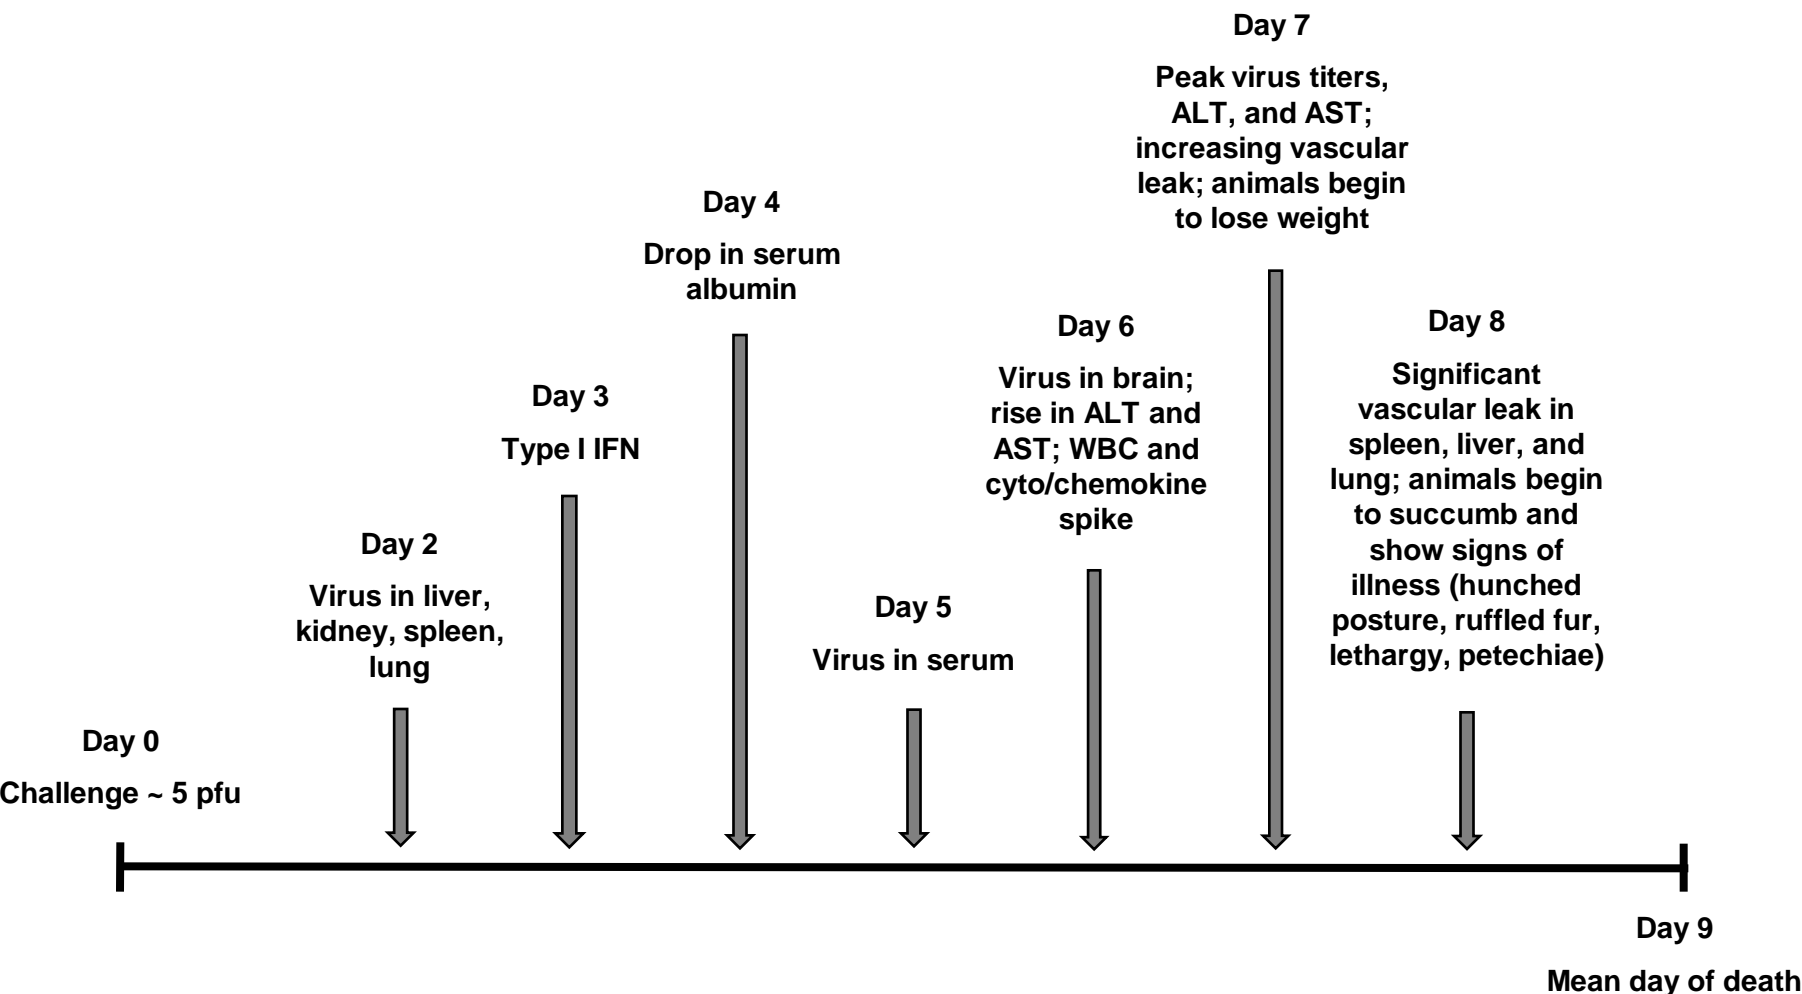

Supplement: MOESM9 [file 9608886]
